# Supplementary material
Source: PubMed Central journal article supplement (PMC11029570)
Supplement: 262_2015_1690_MOESM1_ESM.pdf [file 262_2015_1690_MOESM1_ESM.pdf]

**Supplementary Table 1** The sequences of primer sets were used in this study for PCR and Real-Time PCR analysis.

| genes          | sequences (Forward ; 5'-3') | sequences (Reverse ; 5'-3') |
|----------------|-----------------------------|-----------------------------|
| GADD34         | cttttggcaaccagaaccg         | cagagccgcagcttctatct        |
| IL-6           | CCGGAGAGGAGACTTCACAG        | TCCACGATTTCCCAGAGAAC        |
| IL-1 $\beta$   | GCCCATCCTCTGTGACTCAT        | AAGGCCACAGGTATTTTGTCG       |
| MMP9           | GAAGGCAAACCCTGTGTGTT        | AGAGTACTGCTTGCCCAGGA        |
| TNF- $\alpha$  | GCCCATATACCTGGGAGGAG        | CACCCATTCCCTTCACAGAG        |
| CCR2           | AGAGAGCTGCAGCAAAAAGG        | GGAAAGAGGCAGTTGCAAAG        |
| MCP1           | TGAATGTGAAGTTGACCCGT        | AAGGCATCACAGTCCGAGTC        |
| P53            | agagaccgccgtacagaaga        | ctgtagcatgggcatccttt        |
| c-Myc          | CTGTCCATTCAAGCAGACGA        | TCCAGCTCCTCCTCGAGTTA        |
| $\beta$ -actin | AGTGTGACGTTGACATCCGT        | GCAGCTCAGTAACAGTCCGC        |

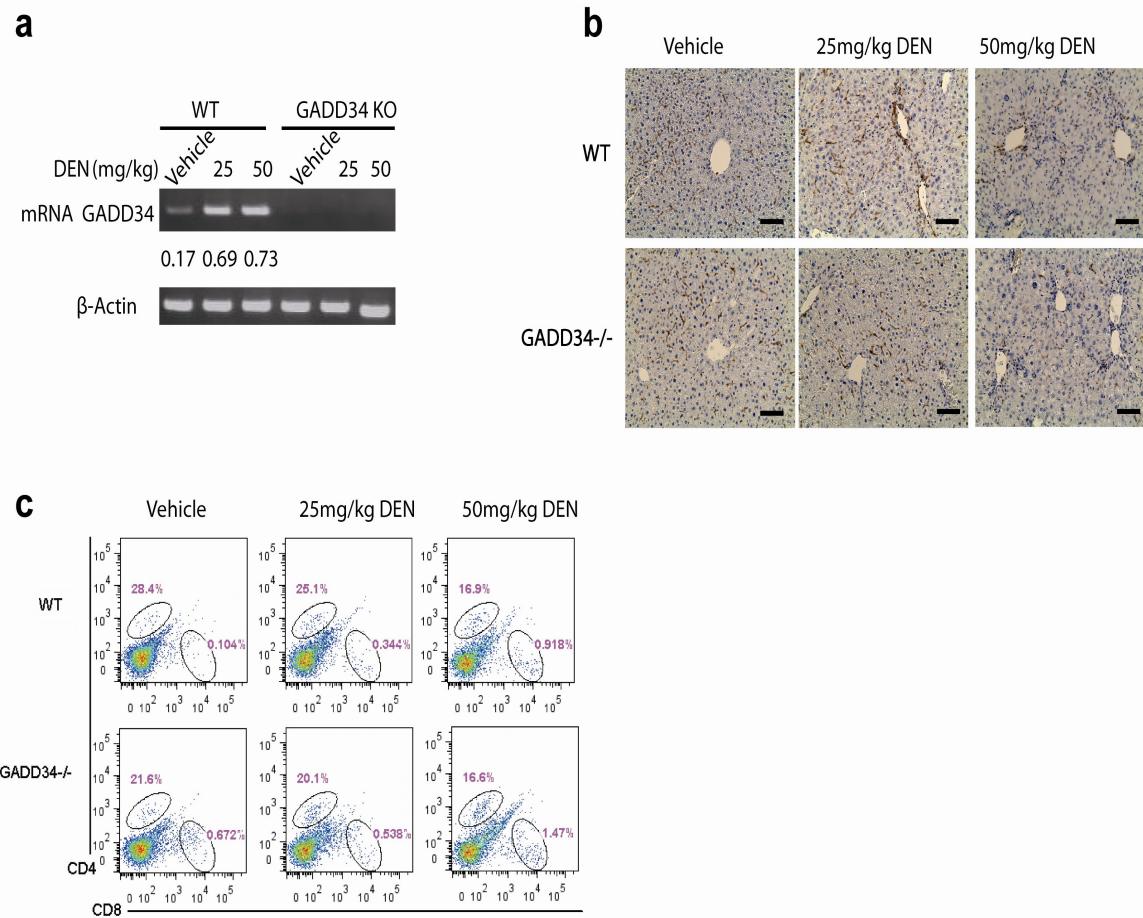

**Supplementary Fig. 1** The effects of GADD34 in livers upon chronic DEN treatment. **a** Representative result of GADD34 and  $\beta$ -actin mRNA levels analyzed by RT-PCR using liver sample from WT and GADD34<sup>-/-</sup> mice after chronic DEN treatment. **b** IHC study of infiltrated Kupffer cells/macrophages in liver sections from WT and GADD34<sup>-/-</sup> mice by staining with anti-F4/80 after chronic DEN treatment. Scale bars, 100 $\mu$ m. **c** Representative result of flow cytometric analyses of CD4<sup>+</sup> and CD8<sup>+</sup> positive cells in liver samples from WT and GADD34<sup>-/-</sup> mice after chronic DEN treatment. Single cell suspensions were stained and analyzed for the indicated surface markers as the circle indicates. n = 3 for each group.
